# Supplementary material for: Renewable gasoline from aqueous phase hydrodeoxygenation of aqueous sugar solutions prepared by hydrolysis of maple wood
Source: Royal Society of Chemistry journal article supplement (doi:10.1039/c0gc00501k), 2010-11-19
Supplement: c0gc00501k.pdf [file c0gc00501k.pdf]

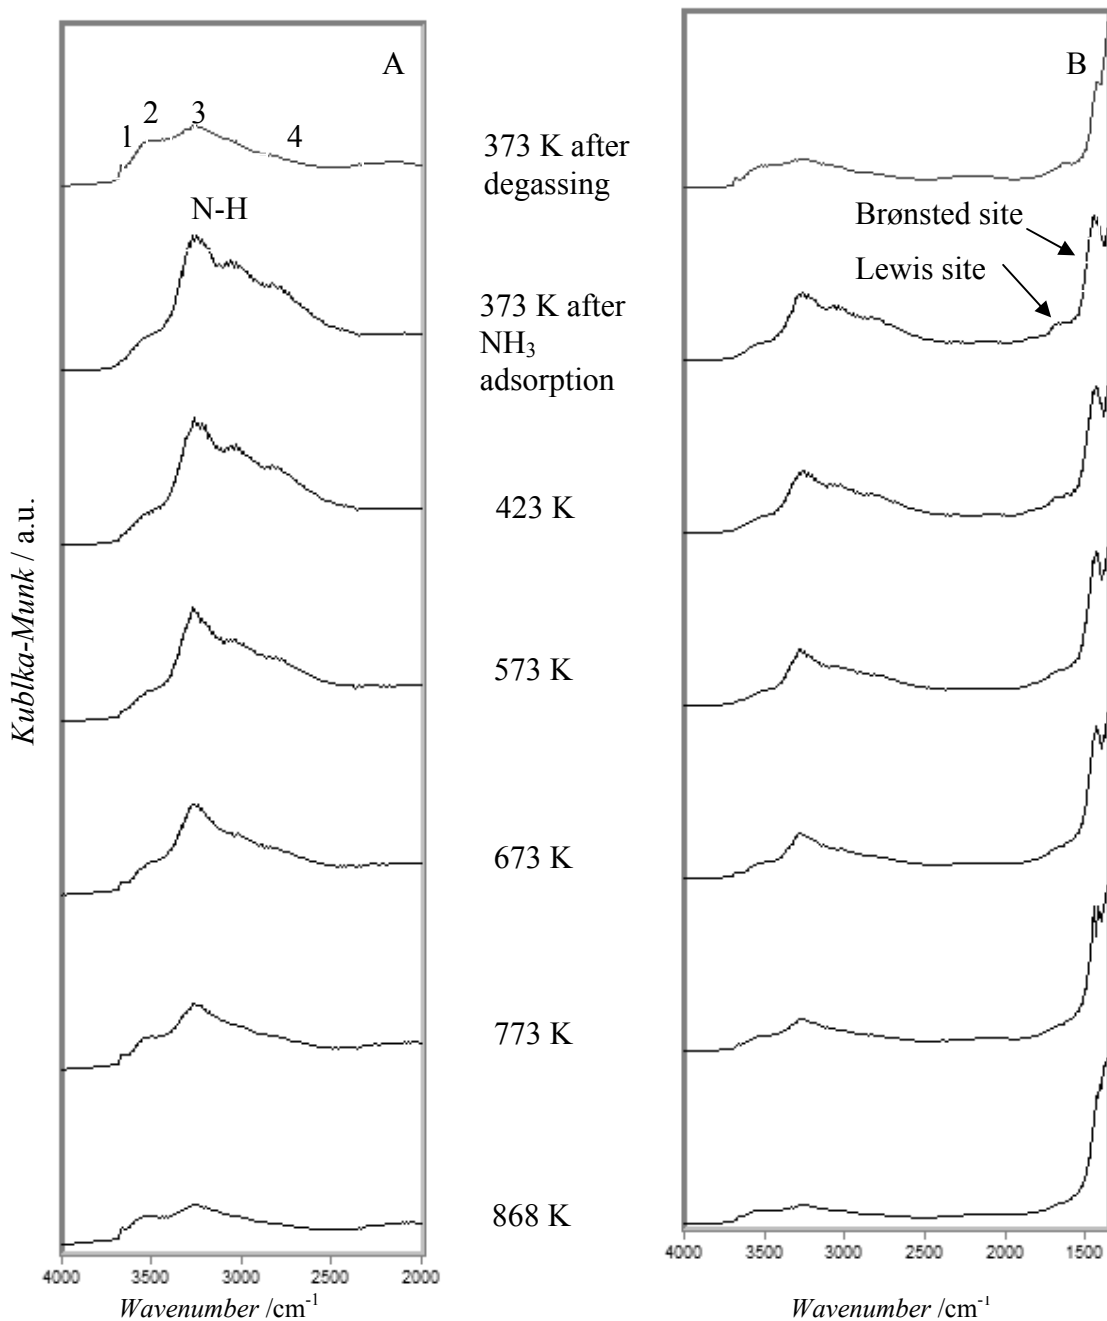

**Fig. S1** NH<sub>3</sub>-DRIFTS spectra of ZrPO<sub>x</sub> after adsorption of ammonia at 373 K followed by degassing under He flow at various temperatures. Shown is (A) the O-H/N-H stretching region (4000- 2000 cm<sup>-1</sup>) and (B) the region 4000-1350 cm<sup>-1</sup> including the HNH bending region.

The Research Octane Number (RON) of the gasoline range products were estimated according to method introduced in the Automotive Fuel Reference Book by making a weighted average using measured values for each of the components (listed in Table S1), as shown below for a three-component blend<sup>1</sup>.

$$PB = V_1P_1 + V_2P_2 + V_3P_3$$

Where PB is the property (such as RON, MON) of the blend, P<sub>1</sub>, P<sub>2</sub>, P<sub>3</sub> are the properties of the components and V<sub>1</sub>, V<sub>2</sub>, V<sub>3</sub> are the volume fractions.

**Table S1.** Physical properties and research octane number of different gasoline rang products.

|                              | Molar mass<br>(g mol <sup>-1</sup> ) | Boiling<br>point (K) | Density<br>(g mL <sup>-1</sup> ) | Research<br>octane<br>number<br>(RON) | Water<br>solubility<br>(g L <sup>-1</sup> ) |
|------------------------------|--------------------------------------|----------------------|----------------------------------|---------------------------------------|---------------------------------------------|
| Pentane                      | 72.15                                | 309                  | 0.626                            | 62 <sup>2</sup>                       | 0.1                                         |
| Hexane                       | 86.18                                | 342                  | 0.655                            | 26 <sup>2</sup>                       | 0.01                                        |
| Ethanol                      | 40.07                                | 351                  | 0.789                            | 130 <sup>3</sup>                      | Miscible                                    |
| Propanol                     | 60.1                                 | 370                  | 0.803                            | 118 <sup>3</sup>                      | Miscible                                    |
| Acetone                      | 58.08                                | 330                  | 0.793                            | 118 <sup>3</sup>                      | Miscible                                    |
| Butanol                      | 74.12                                | 390                  | 0.810                            | 96 <sup>3</sup>                       | 77                                          |
| Butanone                     | 72.11                                | 353                  | 0.805                            | 96 <sup>3</sup>                       | 290                                         |
| Tetrahydrofuran              | 72.11                                | 339                  | 0.889                            | 73 <sup>4</sup>                       | 301                                         |
| Butanoic acid                | 88.11                                | 435                  | 0.860                            | 96 <sup>3</sup>                       | Miscible                                    |
| Pentanol                     | 88.15                                | 409                  | 0.814                            | 84 <sup>3</sup>                       | 27                                          |
| Pentanone                    | 86.13                                | 376                  | 0.809                            | 84 <sup>3</sup>                       | 0.04                                        |
| 2-Methyl-tetrahydro-furan    | 86.13                                | 352                  | 0.86                             | 86 <sup>5</sup>                       | 140                                         |
| Tetrahydropyran              | 86.13                                | 361                  | 0.880                            | 73 <sup>4</sup>                       | 80                                          |
| Pentanoic acid               | 102.13                               | 459                  | 0.930                            | 97 <sup>3</sup>                       | 50                                          |
| Tetrahydrofurfuryl alcohol   | 102.13                               | 451                  | 1.054                            | 108 <sup>4</sup>                      | Miscible                                    |
| Hexanol                      | 102.17                               | 431                  | 0.814                            | 56 <sup>6</sup>                       | 6                                           |
| Hexanone                     | 100.16                               | 400                  | 0.811                            | 56 <sup>6</sup>                       | 14                                          |
| 2,5-Dimethyl-tetrahydrofuran | 100.16                               | 364                  | 0.833                            | 82 <sup>6</sup>                       | Miscible                                    |
| 2-Methyl-tetrahydropyran     | 100.16                               | 352                  | 0.863                            | 87 <sup>5</sup>                       | 39                                          |
| Hexanoic acid                | 116.16                               | 475                  | 0.920                            | 56 <sup>6</sup>                       | 11                                          |
| Tetrahydropyran alcohol      | 116.16                               | 460                  | 1.027                            | 108 <sup>4</sup>                      | Miscible                                    |

## References

1. K. Owen and T. Coley, *Automotive Fuels Reference Book*, Society of Automotive Engineers. Inc., Warrendale, 1995.
2. A. T. Balaban, *Pure & Appl. Chem.*, 1983, **55**, 199-206.
3. M. S. Graboski, An Analysis of Alternatives for Unleaded Petrol Additives for South Africa, <http://www.unep.org/PCFV/PDF/PubGraboskiReport.pdf>.
4. S. Sitthisa, M. C. Camacho, T. Sooknoi, R. G. Mallinson, L. L. Lobban and D. E. Resasco, Improvement of Bio-oil Molecule for a Gasoline Octane Booster, <http://www.ou.edu/cbr/2008-Kyu-GROWposter.pdf>.
5. S. F. Paul, AN OPTIMIZED ALTERNATIVE MOTOR FUEL FORMULATION: NATURAL GAS LIQUIDS, ETHANOL, AND A BIOMASS-DERIVED ETHER, [http://www.anl.gov/PCS/acsfuel/preprint%20archive/Files/43\\_3\\_BOSTON\\_08-98\\_0373.pdf](http://www.anl.gov/PCS/acsfuel/preprint%20archive/Files/43_3_BOSTON_08-98_0373.pdf).

6. Y. Roman-Leshkov, C. J. Barrett, Z. Y. Liu and J. A. Dumesic, *Nature*, 2007, **447**, 982-985.

**Table S2** Hydrogenation of mono-, di- and polysaccharides.

| Saccharide       | Catalyst                                 | Conditions                                                                                                                                                                                                 | Conversion                                                                                                  | Yield                                                                                                                                                                       | Ref.  |
|------------------|------------------------------------------|------------------------------------------------------------------------------------------------------------------------------------------------------------------------------------------------------------|-------------------------------------------------------------------------------------------------------------|-----------------------------------------------------------------------------------------------------------------------------------------------------------------------------|-------|
| glucose          | Ru                                       | T=393 K, total pressure = 120 bar, glucose concentration: 40 wt % glucose in aqueous solution (120 mL), reaction time 5 h, stirring at 850 rpm                                                             | ~100% conversion                                                                                            | ~100% selectivity sorbitol                                                                                                                                                  | 1     |
| glucose          | Ru/C                                     | 5%Ru/C catalyst was studied in a semi-batch slurry autoclave, 373–403K 4.0–7.5MPa H <sub>2</sub>                                                                                                           | 100% >300min                                                                                                | ~100% selective to sorbitol                                                                                                                                                 | 2     |
| glucose          | Ru/MWNT                                  | 5wt% Ru<br>393 K; time 120 min; initial H <sub>2</sub> pressure 4 MPa                                                                                                                                      | 62.5%                                                                                                       |                                                                                                                                                                             | 3     |
| fructose         | CuO-ZnO                                  | 35–65 bar and between 90 and 130°C                                                                                                                                                                         | ~100% conv. and selectivity after 250min                                                                    | mannitol                                                                                                                                                                    | 4     |
| Glucose/fructose | Raney Ni                                 | 85 to 130°C, 50 to 1000 psi                                                                                                                                                                                |                                                                                                             | Fructose not hydrogenated                                                                                                                                                   | 5     |
| Glucose/fructose | Rh                                       |                                                                                                                                                                                                            |                                                                                                             | Most effective                                                                                                                                                              | 5     |
| Glucose/fructose | Ru                                       |                                                                                                                                                                                                            |                                                                                                             | >90% xylitol                                                                                                                                                                | 6     |
| xylose           | Raney Ni                                 | 90-100°C, 40-60bar, 50-60wt% xylose                                                                                                                                                                        | 200min                                                                                                      |                                                                                                                                                                             | 6     |
| maltose          | Ru-P                                     | maltose aqueous solution (40 wt%, 50 mL), T = 363 K, PH <sub>2</sub> = 2.0 MPa, reaction time = 2 h, stirring rate = 1200 rpm                                                                              | 98%                                                                                                         | 100% selectivity maltitol                                                                                                                                                   | 7     |
| lactose          | Ni sponge,                               | 300 mL, Parr Co., operating at 20-70 bar and between 110 and 130 °C                                                                                                                                        | 100% 200min                                                                                                 | 90-99% selectivity lactitol, small amounts of lactobionic acid, lactulose, lactulitol, sorbitol, and galactitol                                                             | 8     |
| lactose          | Ni sponge ,<br>Ru/C                      | 120°C, 20-70 Bar H <sub>2</sub>                                                                                                                                                                            | ~100% after 150 min Ni<br>120 min Ru/C                                                                      | Lactitol ~100%                                                                                                                                                              | 9     |
| sucrose          | Raney Ni                                 | 3 h of reaction at 130 °C and 750 psia<br>1wt% cat, 40 g/L sucrose                                                                                                                                         | ~60% 3h                                                                                                     |                                                                                                                                                                             | 10    |
| sucrose          | Ru/Al <sub>2</sub> O <sub>3</sub>        | 3 h of reaction at 130°C and 750 psia<br>1wt% cat, 40 g/L sucrose                                                                                                                                          | ~100% 3h                                                                                                    | 100%, Sorbitol, mannitol                                                                                                                                                    | 10    |
| sucrose          | Ru/NaY,<br>Ru/USY<br>Ru/CaY              | 135°C~ and 12 atm H <sub>2</sub><br>2.5h                                                                                                                                                                   | 100% after 3h                                                                                               | Sorbitol, mannitol                                                                                                                                                          | 11    |
| Inulin           | Ru/C(activated)                          | 1% Ru:C, 80 mL aqueous solution of 1 g inulin and 0.100 g 1% Ru: SX1GNS, 100 °C, 100 bar H <sub>2</sub> .                                                                                                  | 100% 300min                                                                                                 | inulin to D-mannitol and D-glucitol                                                                                                                                         | 12    |
| cellulose        | Ru/CNT                                   | cellulose (0.16 g, equivalent to 1 mmol C <sub>6</sub> H <sub>10</sub> O <sub>5</sub> unit) and the catalyst (0.050 g) with H <sub>2</sub> O (20 mL H <sub>2</sub> of 5 MPa, 185°C, for 24 h with stirring |                                                                                                             | 69 sorbitol 4.0 mannitol 5 Erythritol 5 Glycerol                                                                                                                            | 13    |
| Cellulose        | Ru/C                                     | 245°C, 4 wt% Ru/C,<br>6 MPa H <sub>2</sub>                                                                                                                                                                 | 85.8% 30min                                                                                                 | 34.6 sorbitol,<br>11.4mannitol, 13.4 sorbitan                                                                                                                               | 14    |
| cellobiose       | Pd<br>Rh<br>Pt<br>Ru<br>Ru<br>Ru<br>Ru/C | 120 °C,<br>40 bar H <sub>2</sub> 12 h<br>cellobiose (7.31 mmol), using H <sub>2</sub> O (30 g)<br>HCl to adjust pH                                                                                         | Pd pH 2 100%<br>Rh pH2 100%<br>Pt pH2 100%<br>Ru pH2 100%<br>Ru pH7 87.8%<br>Ru pH10 75. c<br>Ru/C pH7 100% | 100% glucose<br>6.9 sorb 66.9 glu<br>18.5 sorb 42.6 glu<br>100% sorbitol<br>26.4 sorb 1.6 glu 64.8 alc<br>7.2 other<br>24.0 sorb 3.2 glu 55.7 alc<br>17.1 other<br>>99% alc | 15    |
| cellulose        | Ru/C                                     | 170°C, 1wt% H <sub>2</sub> SO <sub>4</sub>                                                                                                                                                                 | 95% 4h                                                                                                      |                                                                                                                                                                             | 16,17 |
| biomass          | Ru/C                                     | 15% load, <190°C for 3-5h, 0.8% H <sub>3</sub> PO <sub>4</sub><br>5wt% Ru/C, 10 wt% cat/biomass                                                                                                            | >99%                                                                                                        | ~100%                                                                                                                                                                       | 16,17 |

## References

1. Kusserow, B.; Sabine Schimpf; Claus, P. *Adv. Synth. Catal.* **2003**, *345*, 289.
2. Crezee, E.; Bram W. Hoffer; Rob J. Berger; Michiel Makkee; Freek Kapteijn; Moulijn, J. A. *Applied Catalysis A: General* **2003**, *251*, 1.
3. Pan, J.; Jinhua Li; Wang, C.; Yang, Z. *Reaction Kinetics and Catalysis Letters* **2007**, *90*, 233–242.
4. Kuusisto, J.; Mikkola, J.-P.; Casal, P. P. e.; Karhu, H.; V`ayrynen, J.; Salmi, T. *Chemical Engineering Journal* **2005**, *115*, 93.
5. Wisniak, J.; Simon, R. *Ind. Eng. Chem. Prod. Res. Dev.* **1979**, *18*.
6. Mikkola, J.-P.; Rainer SjoEholm; Tapio Salmi; MaEki-Arvela, P. *Catalysis Today* **1999**, *48*, 73.
7. Li, H.; Dongsheng Chu; Jun Liu; Minghua Qiao; Weilin Dai; Lia, H. *Adv. Synth. Catal.* **2008**, *350*, 829 – 836.
8. Kuusisto, J.; Mikkola, J.-P.; Sparv, M.; Waern, J.; Heikkilae, H.; Peraelae, R.; Vaeyrynen, J.; Salmi, T. *Industrial & Engineering Chemistry Research* **2006**, *45*, 5900.
9. Salmi, T.; Kuusisto, J.; Warna, J.; Mikkola, J.-P. Conference on the catalysis of organic reactions, 2009.
10. Castoldi, M. C. M.; Camara, L. D. T.; Aranda, D. A. G. *React.Kinet.Catal. Lett.* **2009**, *98*, 83.
11. Barbosa, C. M. B. M.; E. Falabella b; M. J. Mendes c; Lima, N. M.; A., C.; Abreu, M. *React.Kinet.Catal. Lett.* **1999**, *68*, 291.
12. Heinen, A. W.; Joop A. Peters; Bekkum, H. v. *Carbohydrate Research* **2001**, *330*, 381–390.
13. Deng, W.; Tan, X.; Fang, W.; Zhang, Q.; Wang, Y. *Catalysis Letters* **2009**, *133*, 167–174.
14. Luo, C.; Shuai Wang; Liu, H. *Angew. Chem. Int. Ed.* **2007**, *46*, 7636–7639.
15. Yan, N.; Chen Zhao; Chen Luo; Paul J. Dyson; Haichao Liu; Kou, Y. *Journal of the American Chemical Society* **2006**, *128*, 8714.
16. Robinson, J. M.; Burgess, C. E.; Bently, M. A.; Brasher, C. D.; Horne, B. O.; Lillard, D. M.; Macias, J. M.; Mandal, H. D.; Mills, S. C.; O'Hara, K. D.; Pon, J. T.; Raigoza, A. F.; Sanchez, E. H.; Villarreal, J. S. *Biomass and Bioenergy* **2004**, *26*, 473.
17. Robinson, J. M.; Burgess, C. E.; Bently, M. A.; Brasher, C. D.; Horne, B. O.; Lillard, D. M.; Macias, J. M.; Mandal, H. D.; Mills, S. C.; O'Hara, K. D.; Pon, J. T.; Raigoza, A. F.; Sanchez, E. H.; Villarreal, J. S.; Xiang, Q. Polyols: An alternative sugar platform for conversion of biomass to fuels and chemicals. In *ACS Symposium Series*; American Chemical Society: Washington, 2006; Vol. 921; pp 304.
